# Supplementary material for: Water-soluble copper(ii) 5-fluorouracil complexes bearing polypyridyl co-ligands: synthesis, structures and anticancer activity
Source: Royal Society of Chemistry journal article supplement (doi:10.1039/d3dt00363a), 2023-01-01
Supplement: d3dt00363a1.pdf [file d3dt00363a1.pdf]

## Electronic Supplementary Information (ESI)

### **Water-soluble copper(II) 5-fluorouracil complexes bearing polypyridyl co-ligands: Synthesis, structures and anticancer activity**

Ceyda Icel, <sup>\*a</sup> Veysel T. Yilmaz,<sup>a</sup> Muhittin Aygun,<sup>b</sup> Merve Erkisa<sup>c</sup> and Engin Ulukaya<sup>c</sup>

<sup>a</sup>Department of Chemistry, Faculty of Sciences, Karadeniz Technical University, 61080 Trabzon, Turkey.

<sup>b</sup>Department of Physics, Faculty of Sciences, Dokuz Eylul University, 35210 Izmir, Turkey

<sup>c</sup>Molecular Cancer Research Center (ISUMKAM), Istinye University, 34010 Istanbul, Turkey

Corresponding Author:

Assoc. Prof. Dr. Ceyda Icel  
Department of Chemistry  
Faculty of Sciences  
Karadeniz Technical University  
61080 Trabzon, Turkey.

E-mail: cydyilmaz@ktu.edu.tr

**Table S1** Crystallographic data and structure refinement for **1–5**

|                                                             | <b>1</b>                                                             | <b>2</b>                                                                       | <b>3</b>                                                           | <b>4</b>                                                         | <b>5</b>                                                           |
|-------------------------------------------------------------|----------------------------------------------------------------------|--------------------------------------------------------------------------------|--------------------------------------------------------------------|------------------------------------------------------------------|--------------------------------------------------------------------|
| empirical formula                                           | C <sub>16</sub> H <sub>16</sub> ClCuFN <sub>4</sub> O <sub>5</sub> S | C <sub>32</sub> H <sub>28</sub> CuF <sub>2</sub> N <sub>8</sub> O <sub>8</sub> | C <sub>24</sub> H <sub>25</sub> CuFN <sub>9</sub> O <sub>7.5</sub> | C <sub>16</sub> H <sub>17</sub> CuFN <sub>6</sub> O <sub>6</sub> | C <sub>19</sub> H <sub>13</sub> ClCuFN <sub>5</sub> O <sub>2</sub> |
| formula weight                                              | 462.38                                                               | 700.13                                                                         | 642.07                                                             | 471.89                                                           | 461.33                                                             |
| crystal system                                              | monoclinic                                                           | monoclinic                                                                     | monoclinic                                                         | triclinic                                                        | monoclinic                                                         |
| space group                                                 | <i>P</i> 2 <sub>1</sub> / <i>n</i>                                   | <i>I</i> 2/ <i>a</i>                                                           | <i>P</i> 2/ <i>c</i>                                               | <i>P</i> $\bar{1}$                                               | <i>P</i> 2 <sub>1</sub> / <i>n</i>                                 |
| <i>a</i> , Å                                                | 8.1412(4)                                                            | 13.1277(13)                                                                    | 15.6860(11)                                                        | 7.8385(7)                                                        | 11.6071(9)                                                         |
| <i>b</i> , Å                                                | 21.3384(13)                                                          | 19.623(3)                                                                      | 9.7121(9)                                                          | 8.4548(9)                                                        | 13.0317(14)                                                        |
| <i>c</i> , Å                                                | 11.1897(6)                                                           | 24.848(3)                                                                      | 18.3253(18)                                                        | 15.5138(10)                                                      | 12.3107(11)                                                        |
| $\alpha$ , deg                                              | 90                                                                   | 90                                                                             | 90                                                                 | 84.255(7)                                                        | 90                                                                 |
| $\beta$ , deg                                               | 93.746(4)                                                            | 95.728(10)                                                                     | 104.091(9)                                                         | 77.099(7)                                                        | 91.472(8)                                                          |
| $\gamma$ , deg                                              | 90                                                                   | 90                                                                             | 90                                                                 | 70.084(9)                                                        | 90                                                                 |
| <i>V</i> , Å <sup>3</sup>                                   | 1939.72(18)                                                          | 6369.0(14)                                                                     | 2707.7(4)                                                          | 941.93(16)                                                       | 1861.5(3)                                                          |
| <i>T</i> , K                                                | 292(2)                                                               | 293(2)                                                                         | 292(2)                                                             | 292(2)                                                           | 295(2)                                                             |
| <i>Z</i>                                                    | 4                                                                    | 8                                                                              | 2                                                                  | 2                                                                | 4                                                                  |
| $\rho_{\text{calc}}$ (g cm <sup>-3</sup> )                  | 1.450                                                                | 1.460                                                                          | 1.575                                                              | 1.664                                                            | 1.646                                                              |
| $\mu$ (mm <sup>-1</sup> )                                   | 1.583                                                                | 0.752                                                                          | 0.878                                                              | 1.218                                                            | 1.354                                                              |
| <i>F</i> (000)                                              | 940                                                                  | 2856                                                                           | 1320                                                               | 482                                                              | 932                                                                |
| $\theta$ (°)                                                | 3.151-25.027                                                         | 3.296-25.027                                                                   | 3.107-25.039                                                       | 3.129-25.681                                                     | 3.126-26.370                                                       |
| collected refls                                             | 6500                                                                 | 9494                                                                           | 8982                                                               | 6029                                                             | 7139                                                               |
| <i>R</i> <sub>int</sub>                                     | 0.0471                                                               | 0.0670                                                                         | 0.0614                                                             | 0.0343                                                           | 0.0330                                                             |
| data/parameters                                             | 3397/250                                                             | 5577/436                                                                       | 4614/403                                                           | 3421/293                                                         | 3800/262                                                           |
| goodness-of-fit                                             | 1.006                                                                | 1.024                                                                          | 0.709                                                              | 0.865                                                            | 1.077                                                              |
| <i>R</i> <sub>1</sub> [ <i>I</i> >2 $\sigma$ ( <i>I</i> )]  | 0.0526                                                               | 0.1103                                                                         | 0.0466                                                             | 0.0436                                                           | 0.0462                                                             |
| <i>R</i> <sub>1</sub> (all data)                            | 0.1130                                                               | 0.1655                                                                         | 0.1481                                                             | 0.0745                                                           | 0.0679                                                             |
| <i>wR</i> <sub>2</sub> [ <i>I</i> >2 $\sigma$ ( <i>I</i> )] | 0.0789                                                               | 0.2640                                                                         | 0.0566                                                             | 0.0808                                                           | 0.1032                                                             |
| <i>wR</i> <sub>2</sub> (all data)                           | 0.0968                                                               | 0.2998                                                                         | 0.0659                                                             | 0.0851                                                           | 0.1142                                                             |

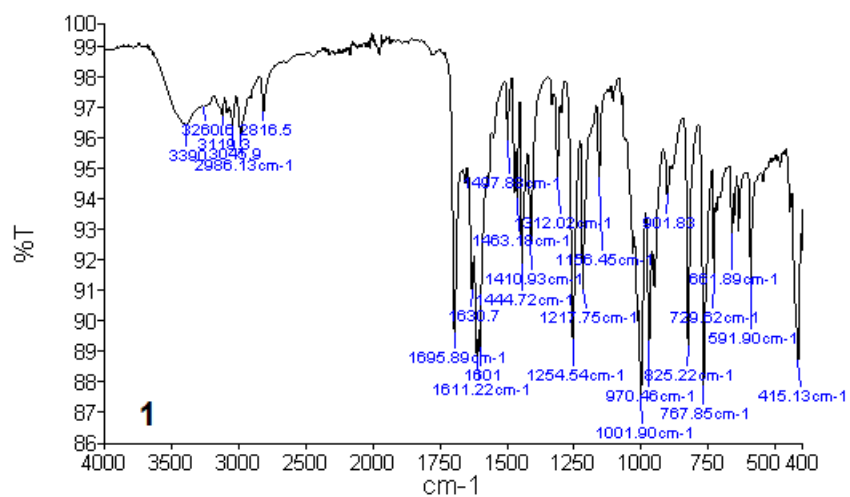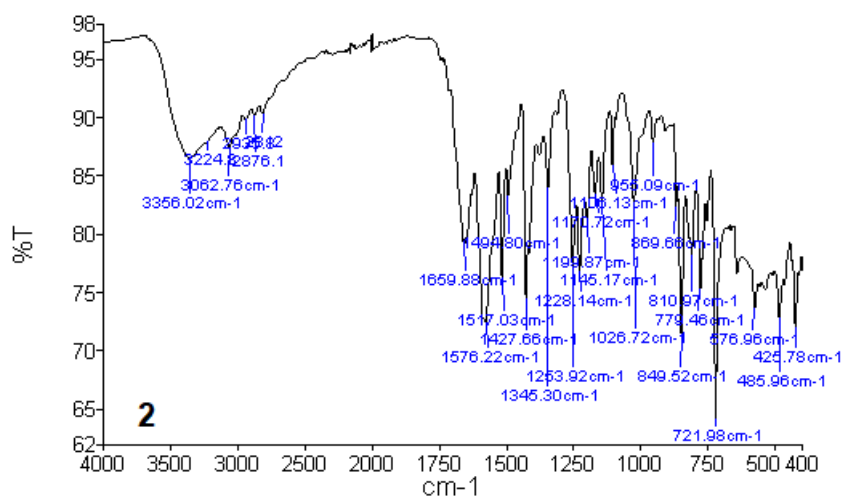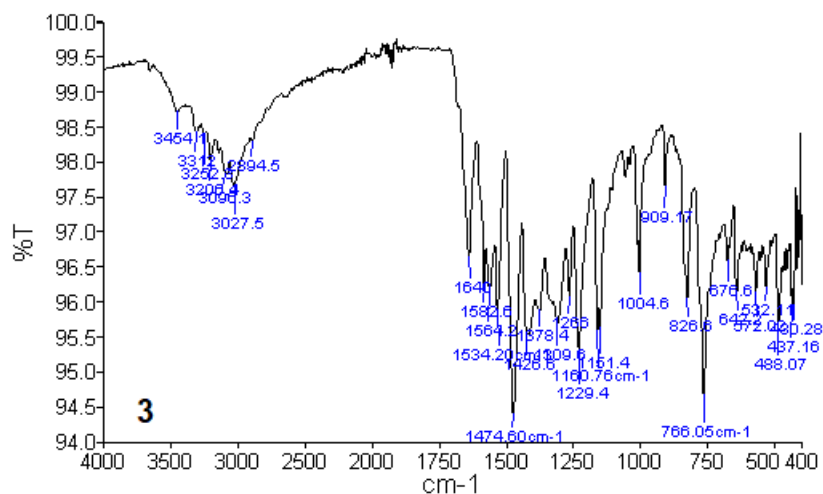

Fig. S1 (continued)

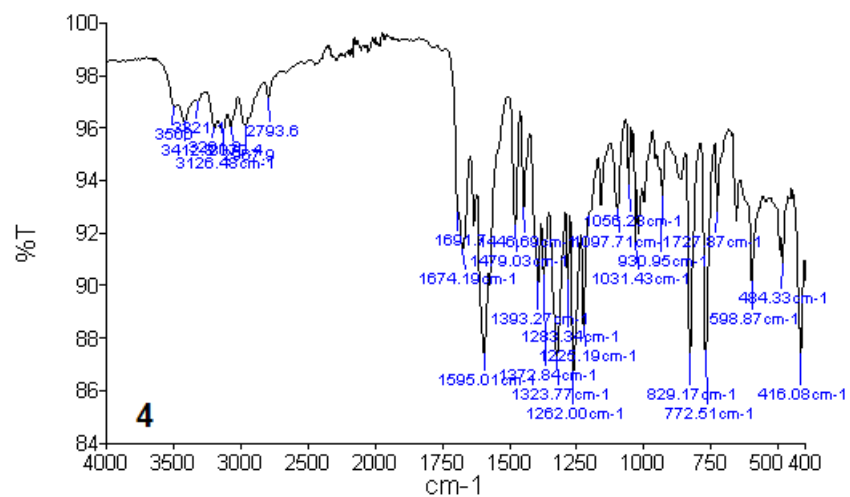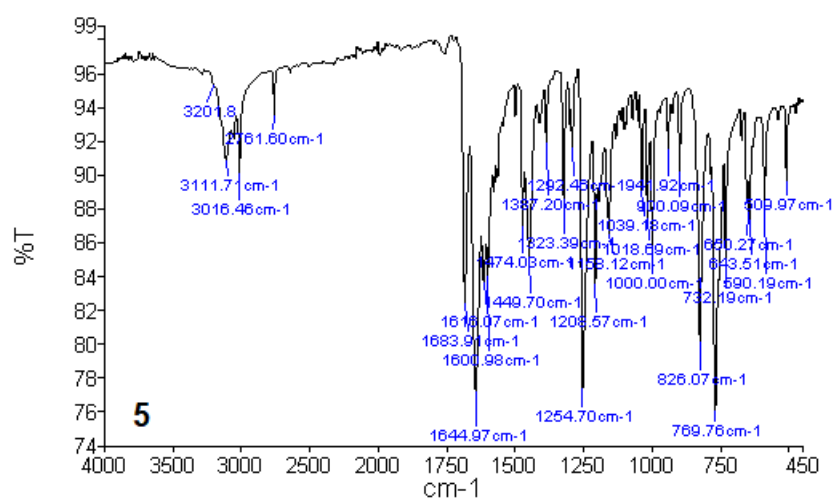

Fig. S1 FTIR spectra of 1–5.

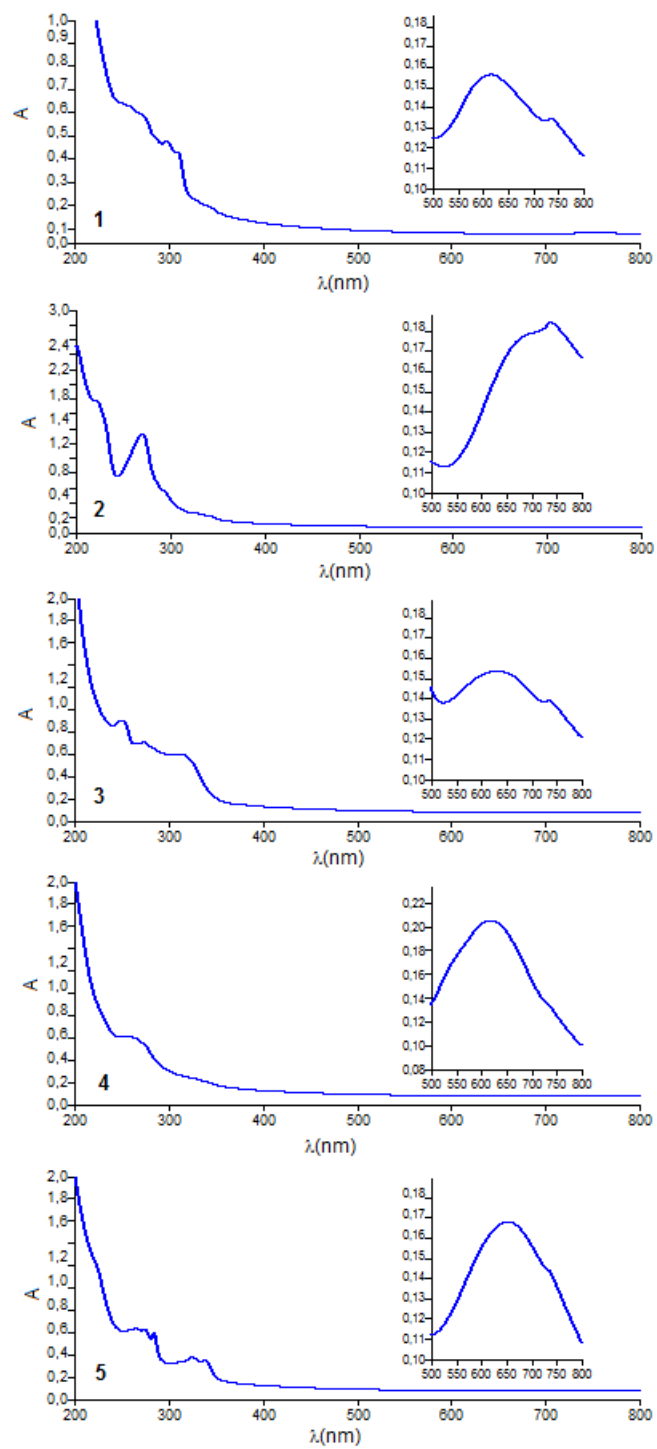

**Fig. S2** UV-Vis spectra of 1–5 (10  $\mu$ M) in water.

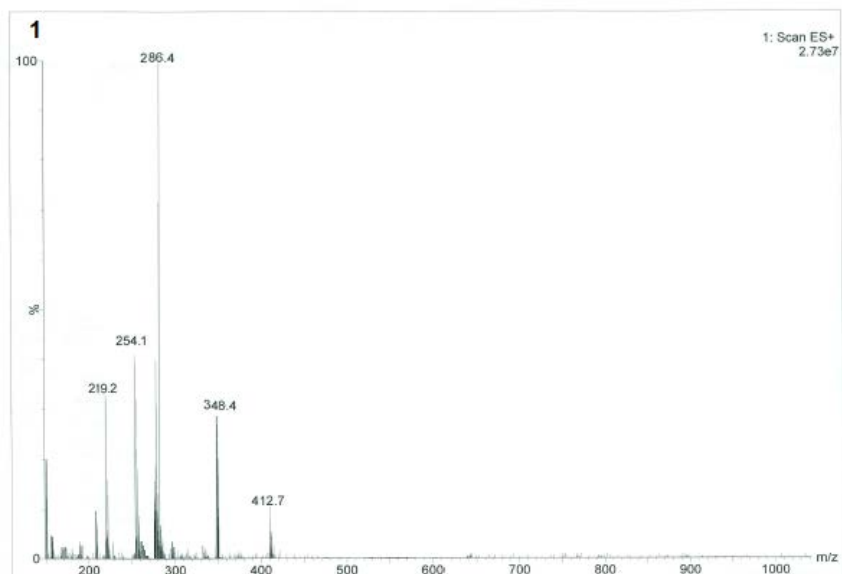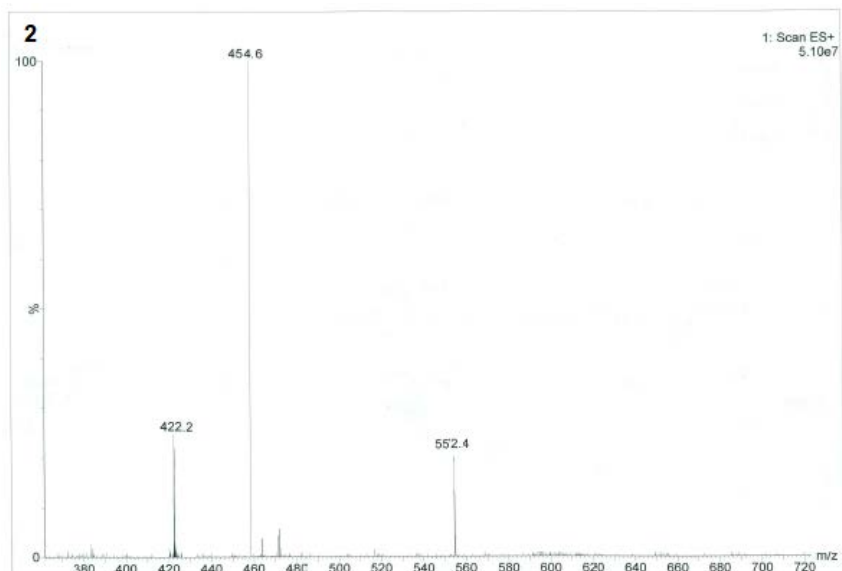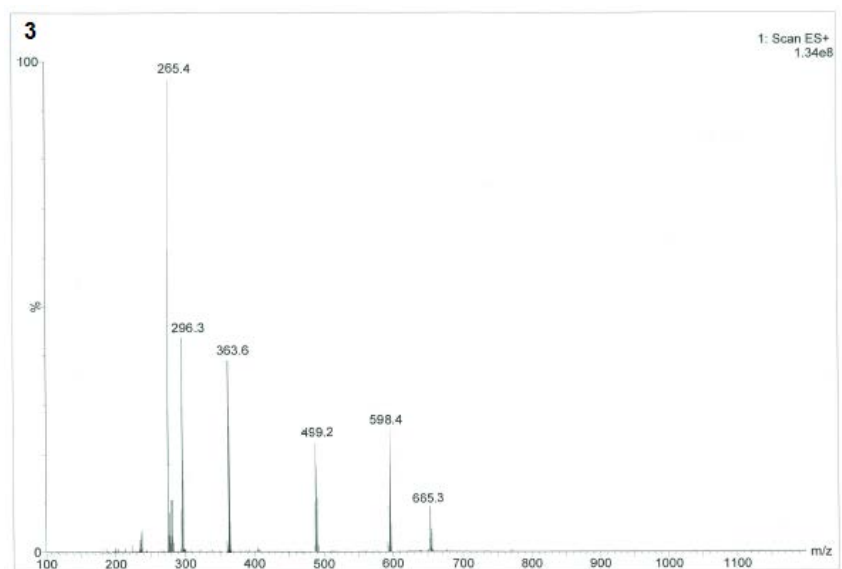

**Fig. S3 (continued)**

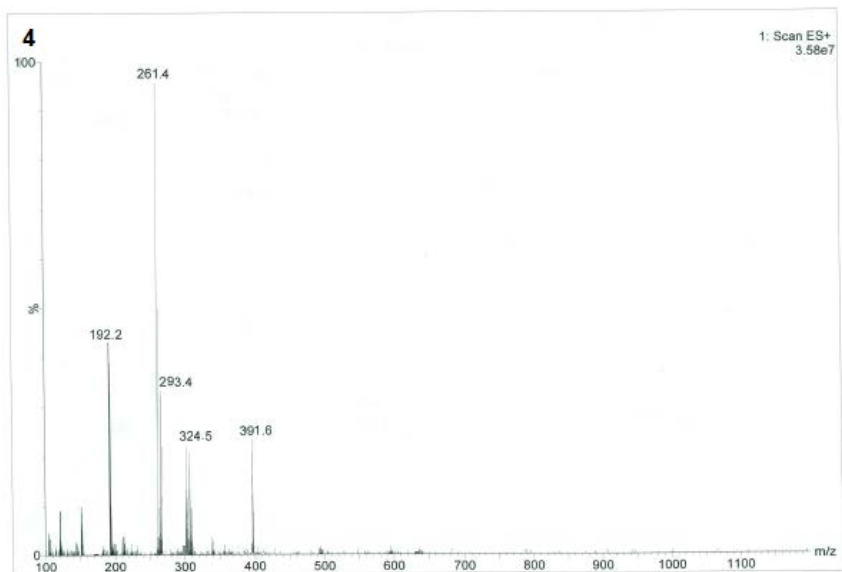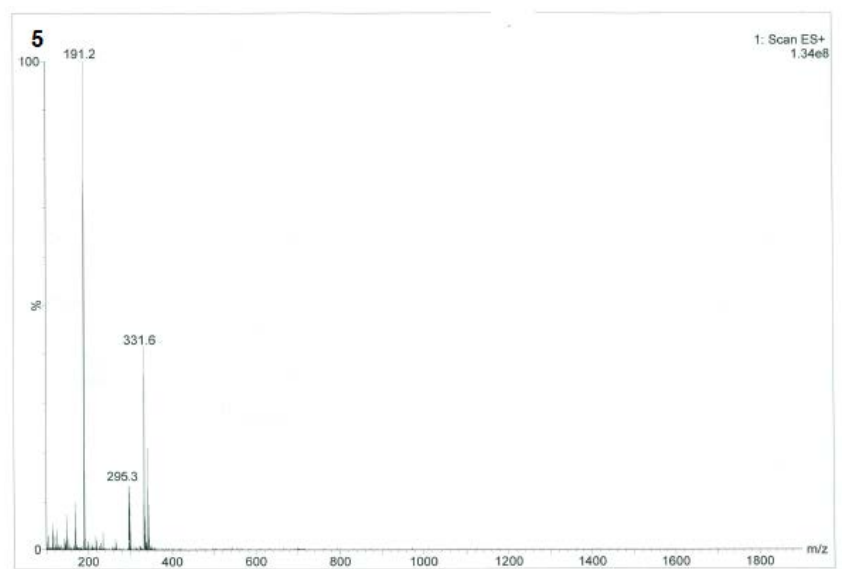

**Fig. S3** ESI-MS spectra of **1–5**.

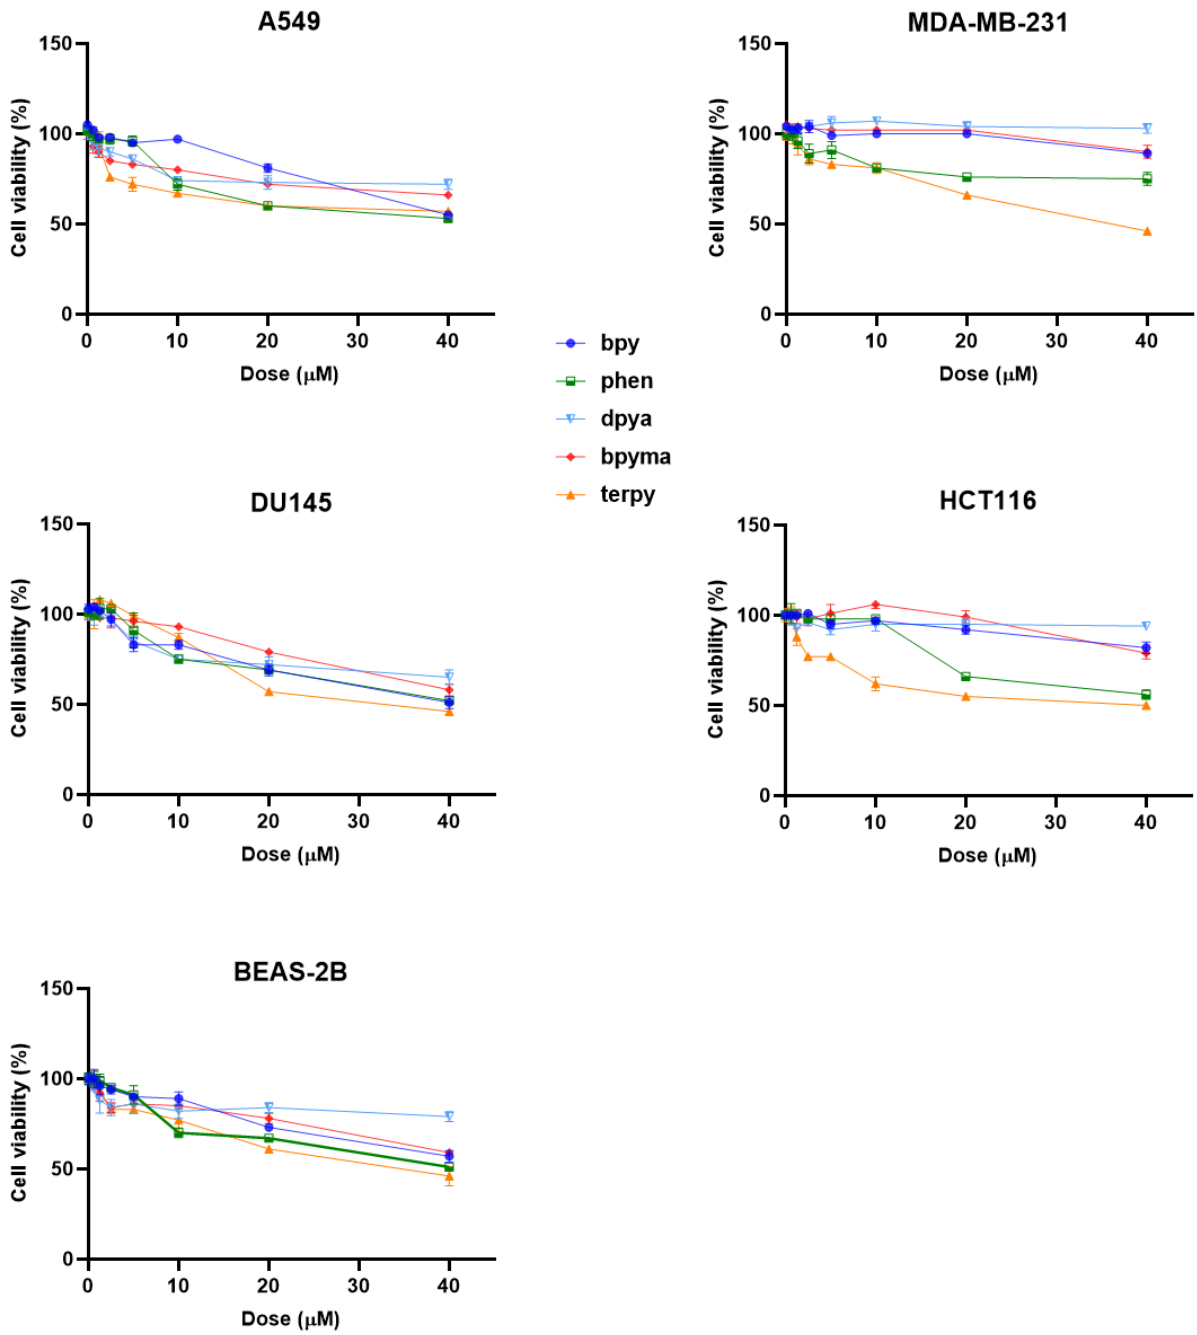

**Fig. S4** (continued)



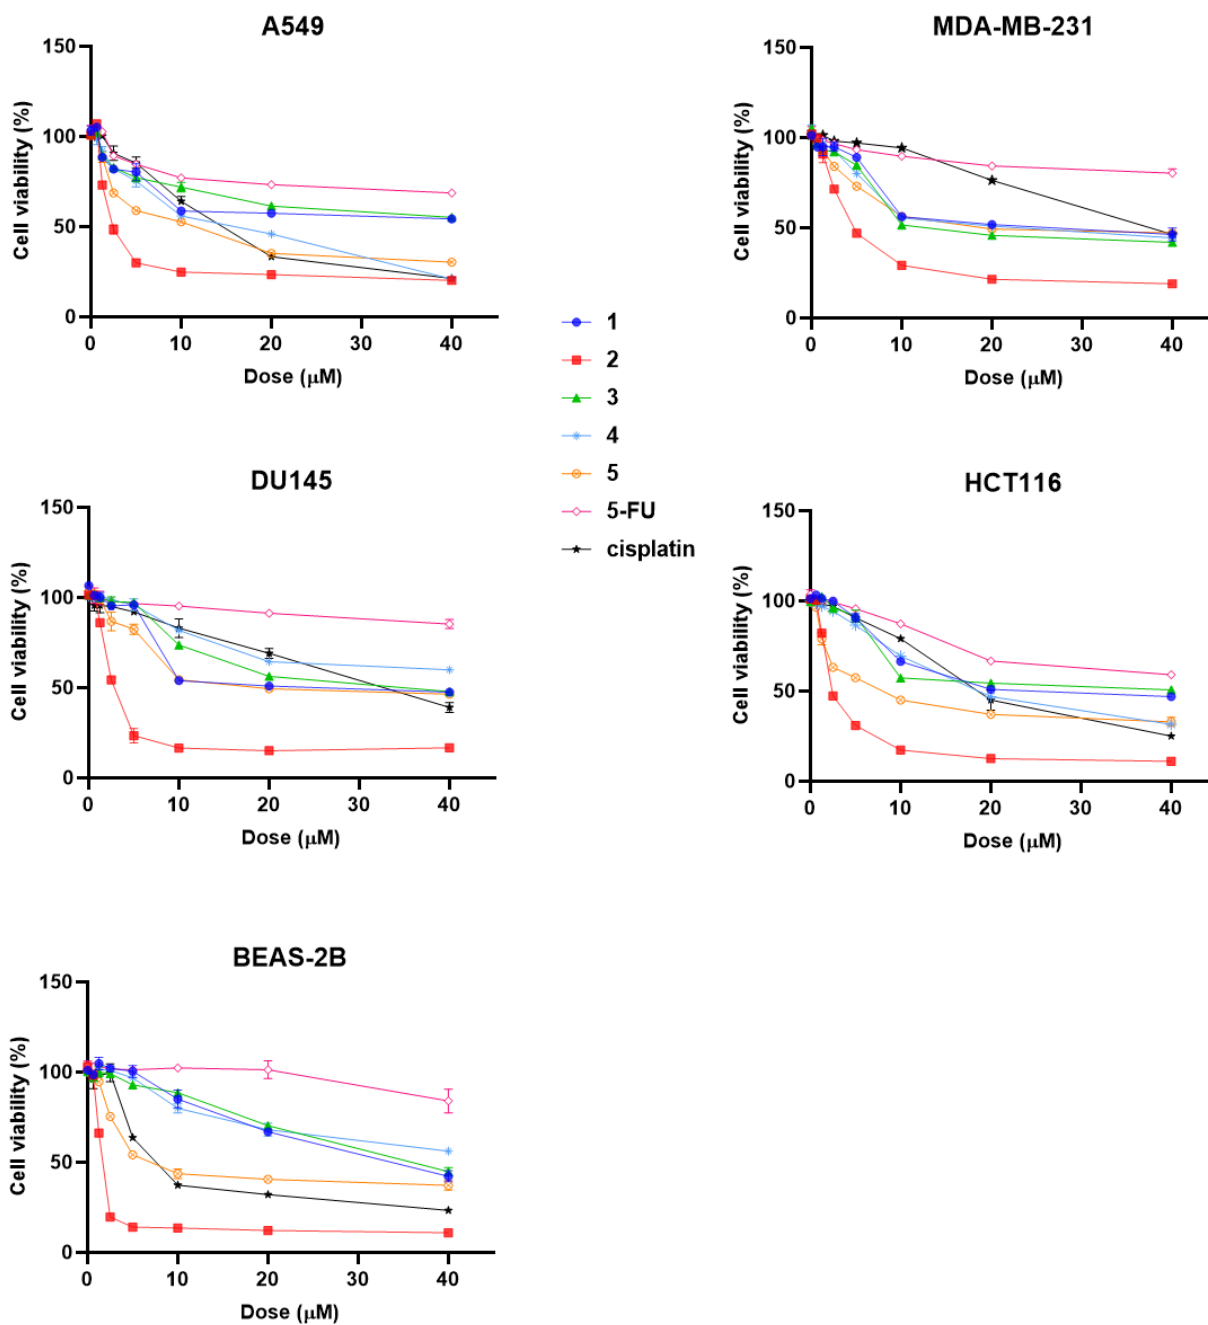

**Fig. S4** Dose-response curves of complexes 1–5, polypyridyl ligands, 5-FU and cisplatin against cancer and normal cell lines after 48 h treatment. Results are represented as mean  $\pm$  standard deviation ( $n = 3$ ).

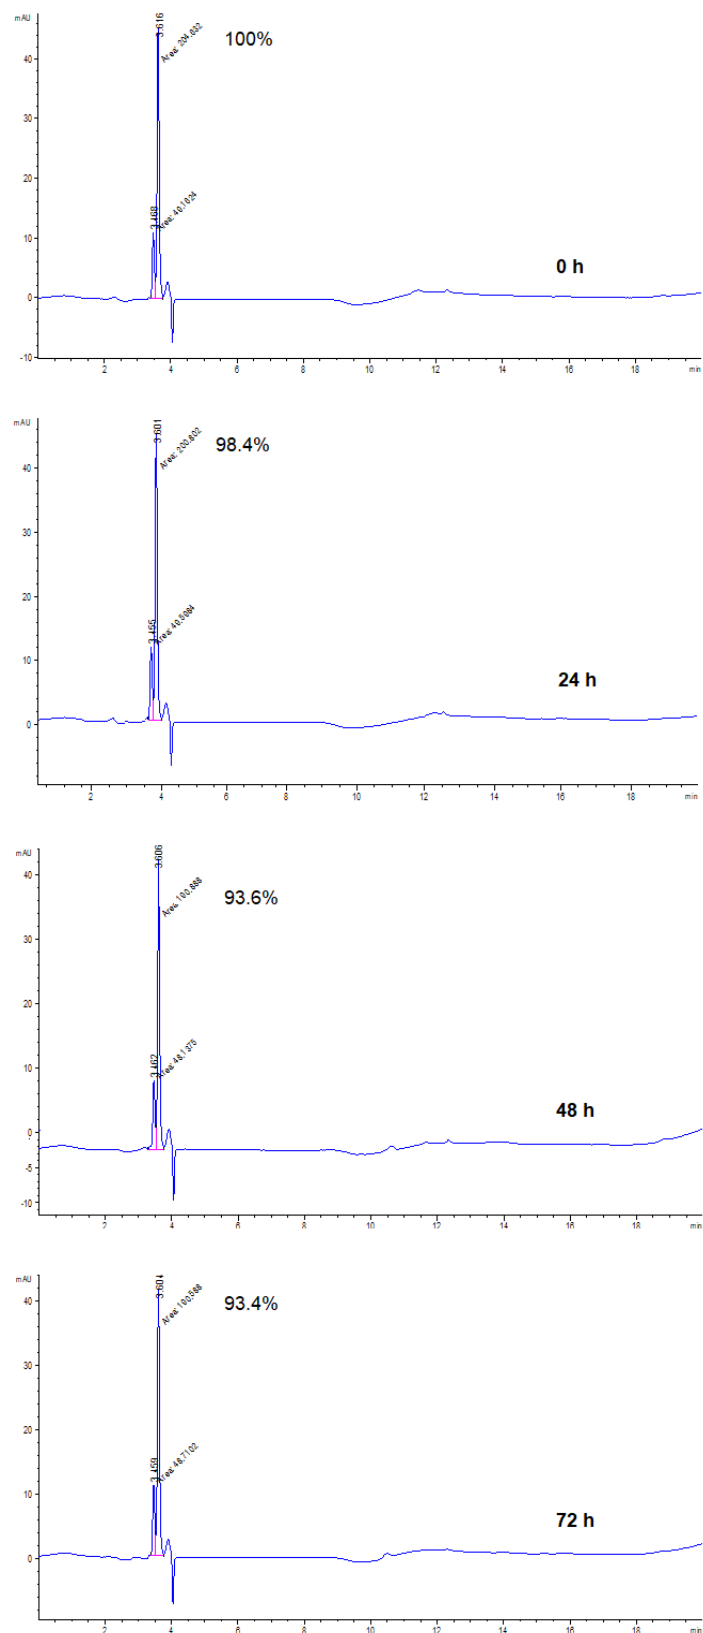

**Fig. S5** The HPLC chromatograms, showing the time-dependent stability of **2** in a saline solution (0.9% NaCl). The amount of **2** was measured by the reverse phase HPLC at 267 nm, and stability values were expressed as the percentage of the complex remaining in the solution.

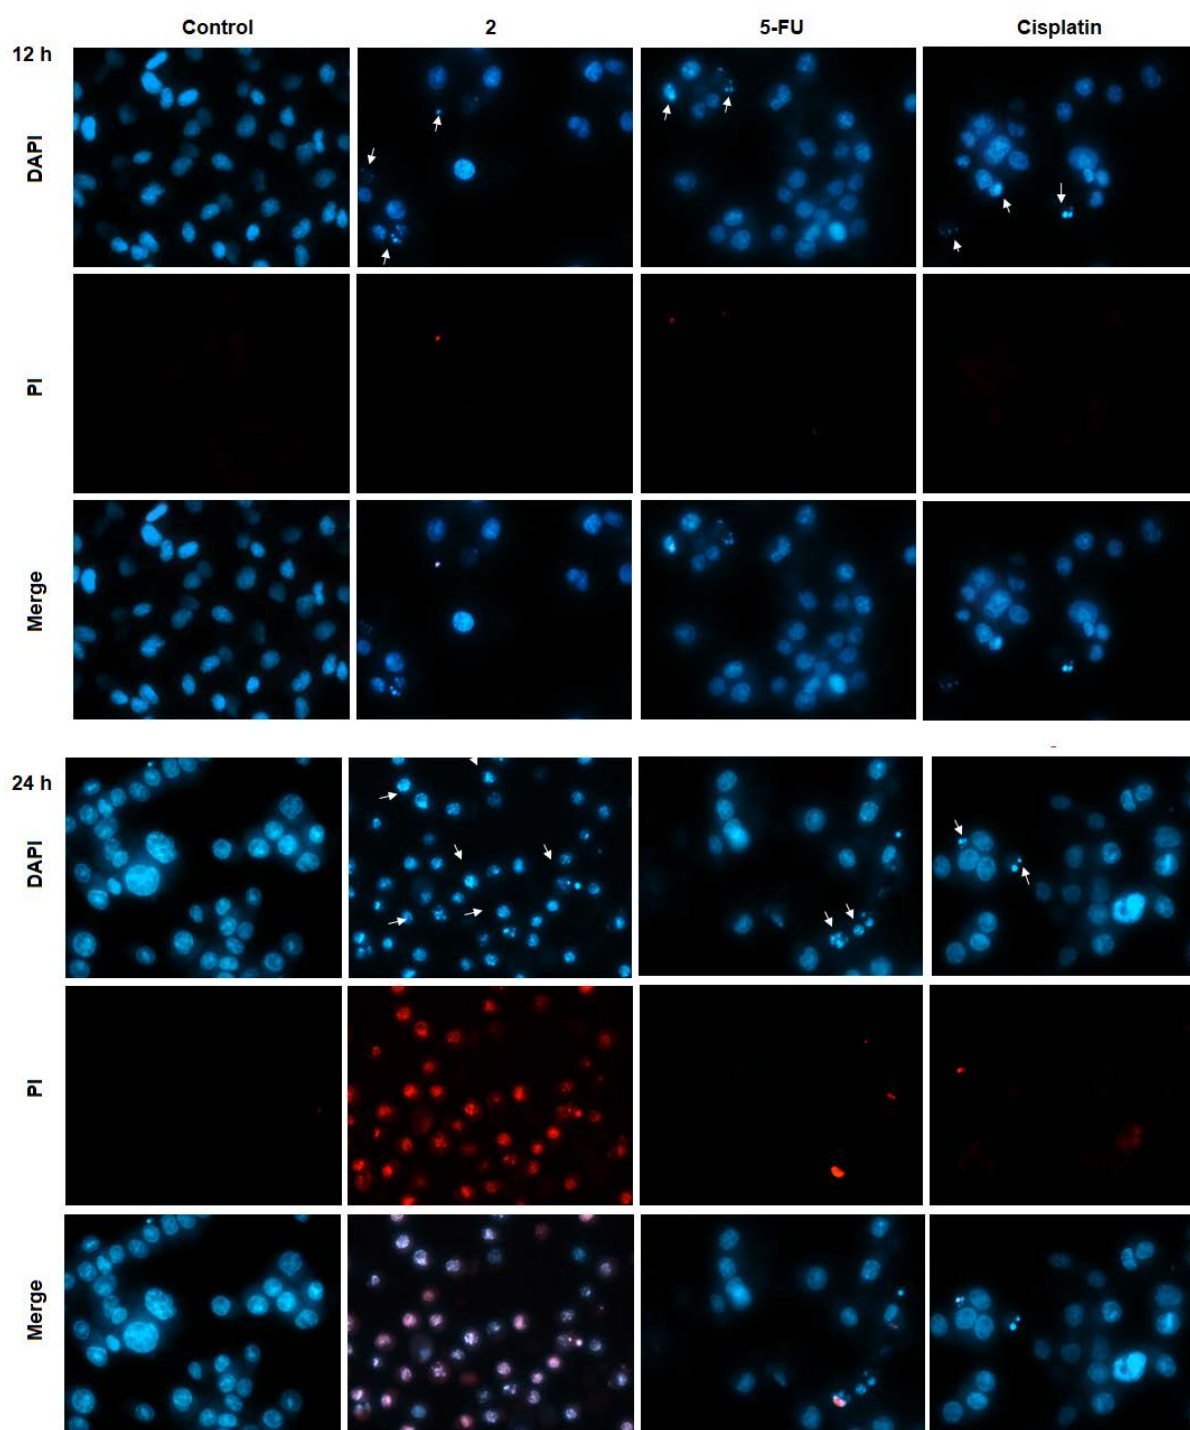

**Fig. S6** DAPI/PI double staining of HCT116 cells treated with **2** (10  $\mu$ M), 5-FU (172  $\mu$ M) and cisplatin (33.9  $\mu$ M), respectively, for 12 and 24 h. Cells were stained with DAPI/PI followed by detection using a fluorescence microscope. DAPI stained the live cells with intact plasma membrane (blue fluorescence), while PI stained dead and apoptotic ones (red fluorescence) with disrupted plasma membrane. Magnification: 40 $\times$ .

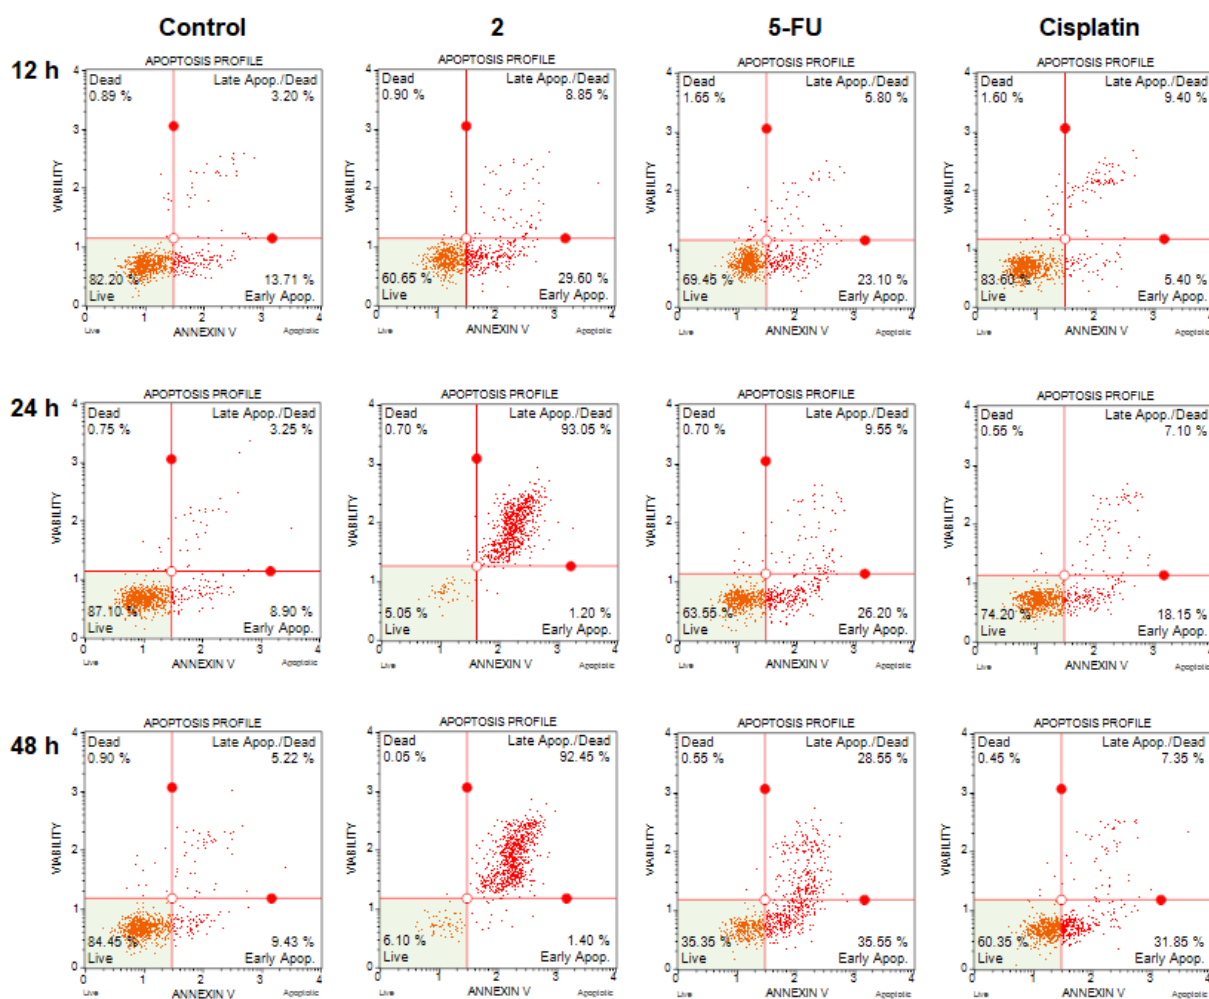

**Fig. S7** Annexin-V/7-AAD assay of HCT116 cells treated with **2** (10  $\mu$ M), 5-FU (172  $\mu$ M) and cisplatin (33.9  $\mu$ M), respectively, for 12, 24 and 48 h. 5-FU and cisplatin were used as positive controls. The quadrants show populations for HCT116 cells in four stages treated by the compounds.

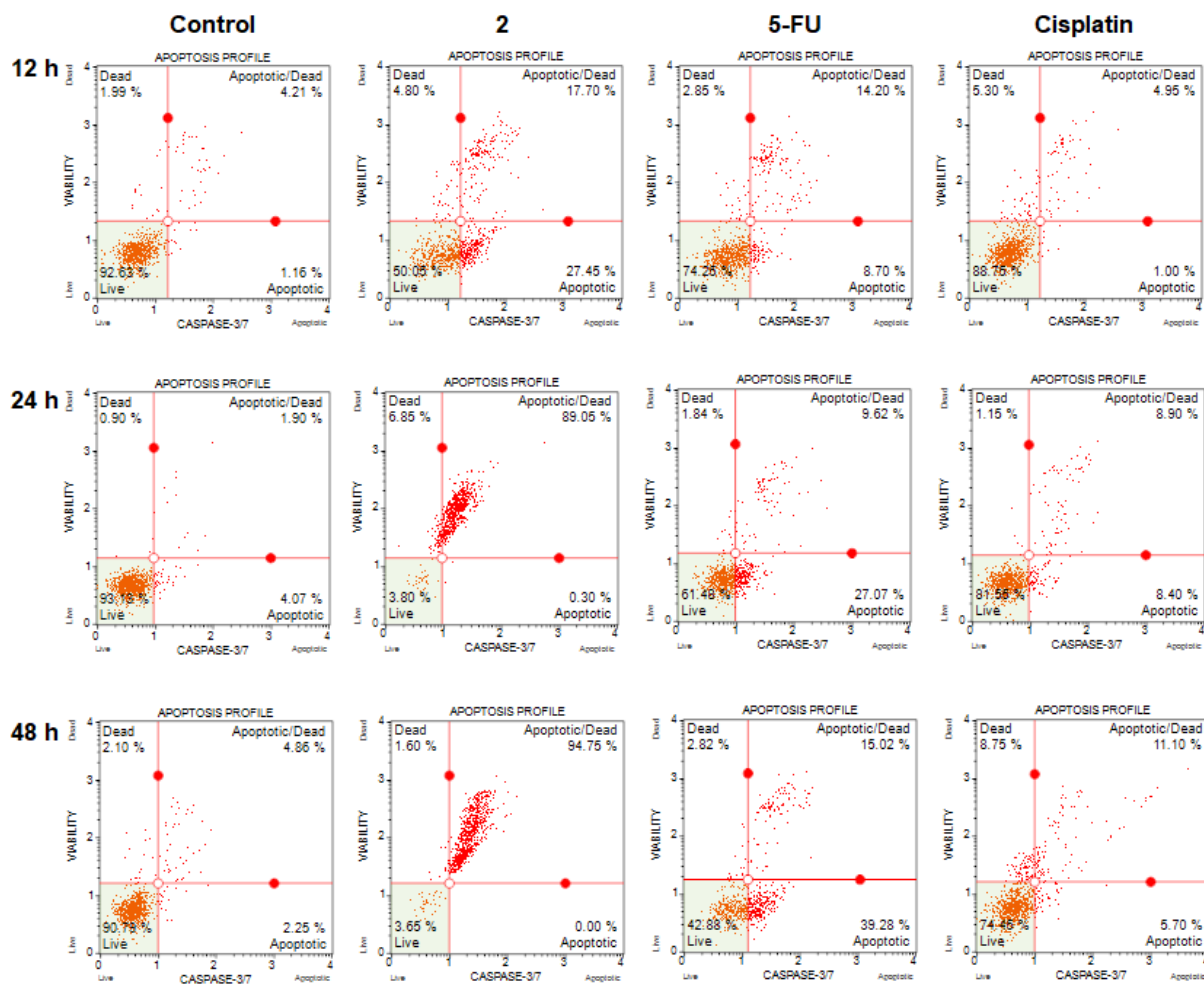

**Fig. S8** Caspase 3/7 activity in HCT116 cells treated with **2** (10  $\mu$ M), 5-FU (172  $\mu$ M) and cisplatin (33.9  $\mu$ M), respectively, for 12, 24 and 48 h. 5-FU and cisplatin were used as positive controls. The quadrants show populations for A549 cells in four stages treated by the compounds.

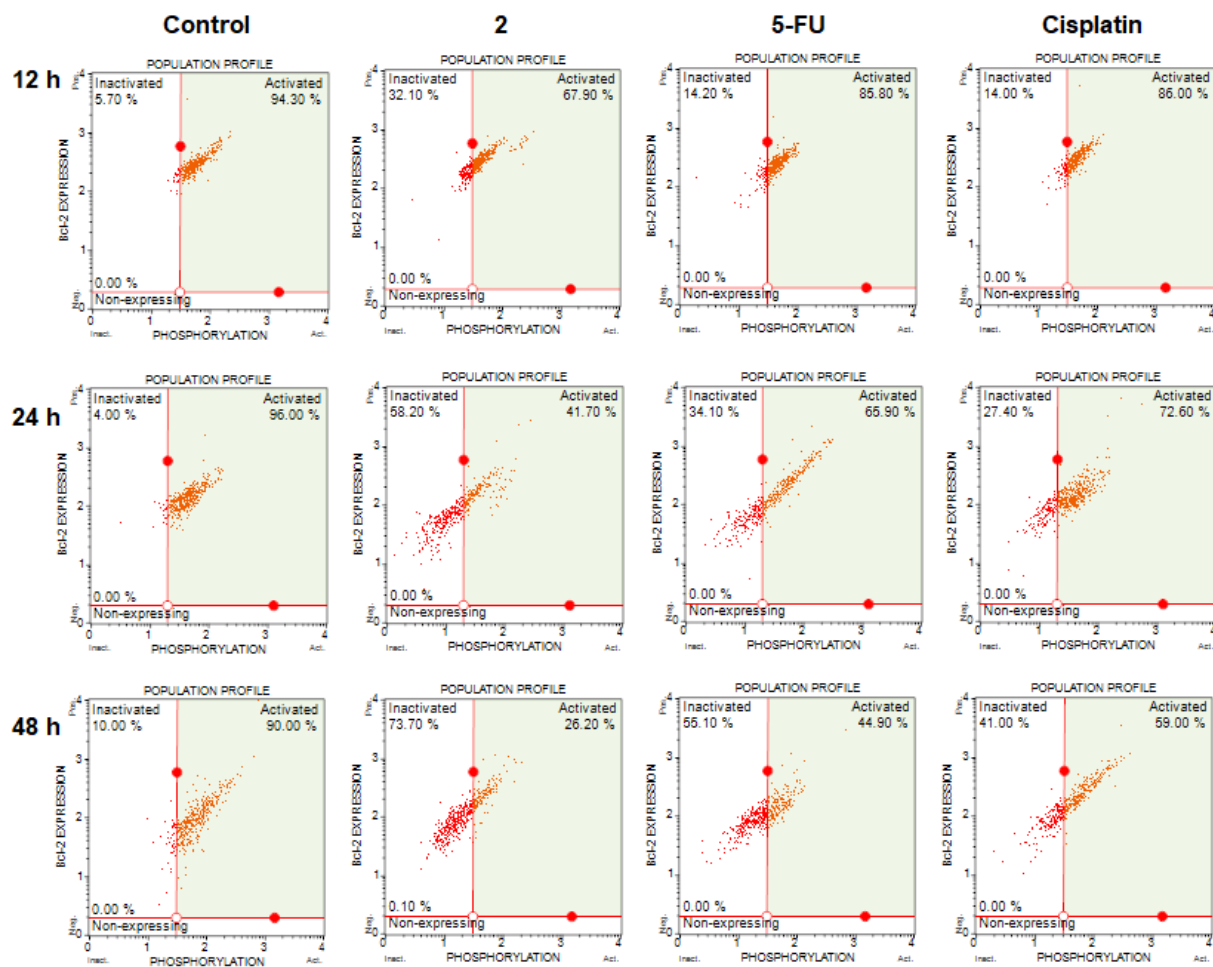

**Fig. S9** Bcl-2 expression levels in HCT116 cells treated with **2** (10  $\mu$ M), 5-FU (172  $\mu$ M) and cisplatin (33.9  $\mu$ M), respectively, for 12, 24 and 48 h. 5-FU and cisplatin were used as positive controls.

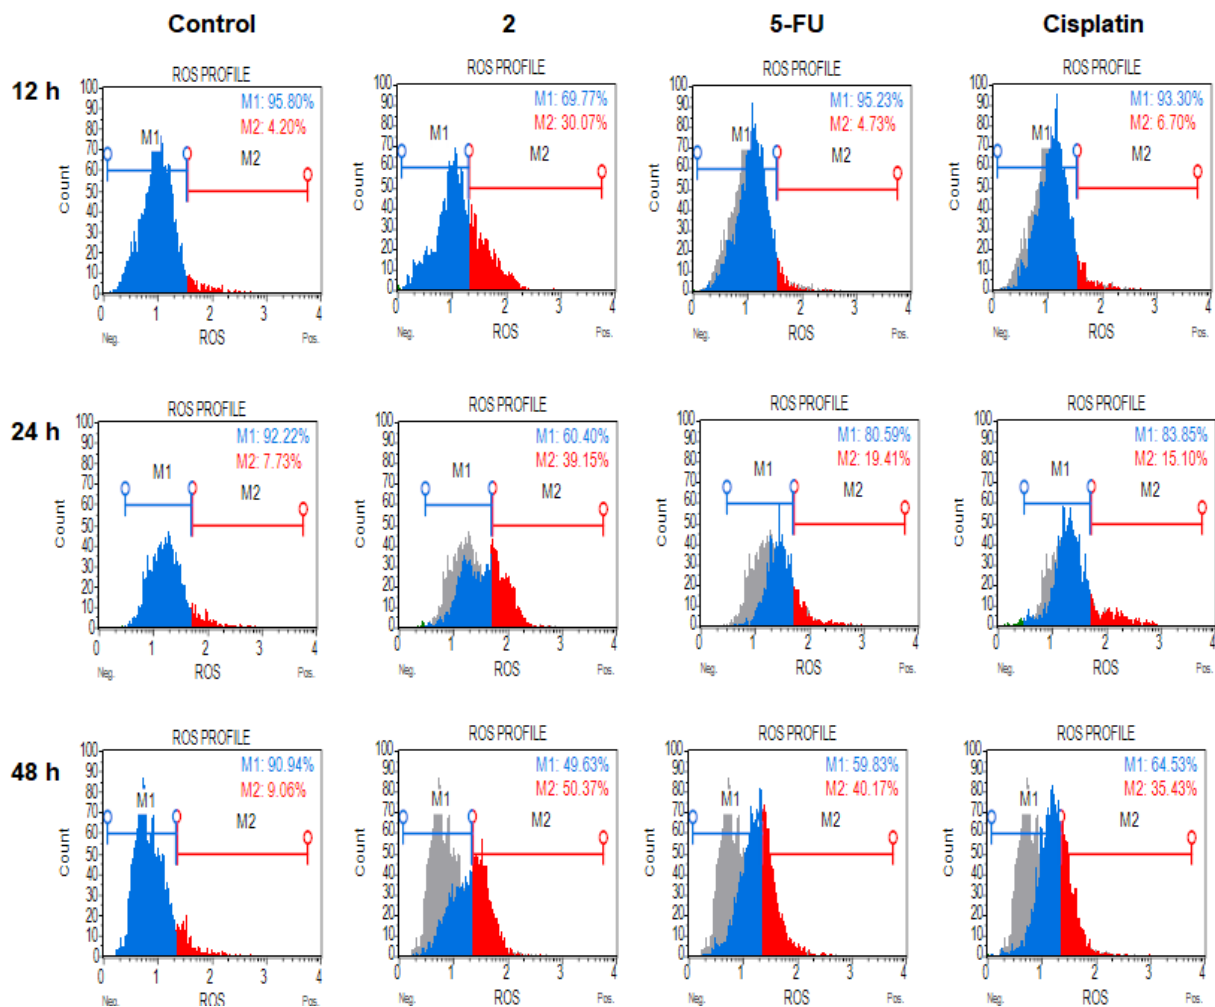

**Fig. S10** ROS generation in HCT116 cells treated with **2** (10  $\mu$ M), 5-FU (172  $\mu$ M) and cisplatin (33.9  $\mu$ M), respectively, for 12, 24 and 48 h. 5-FU and cisplatin were used as positive controls. M1 and M2 correspond to unstressed and oxidatively stressed cells.

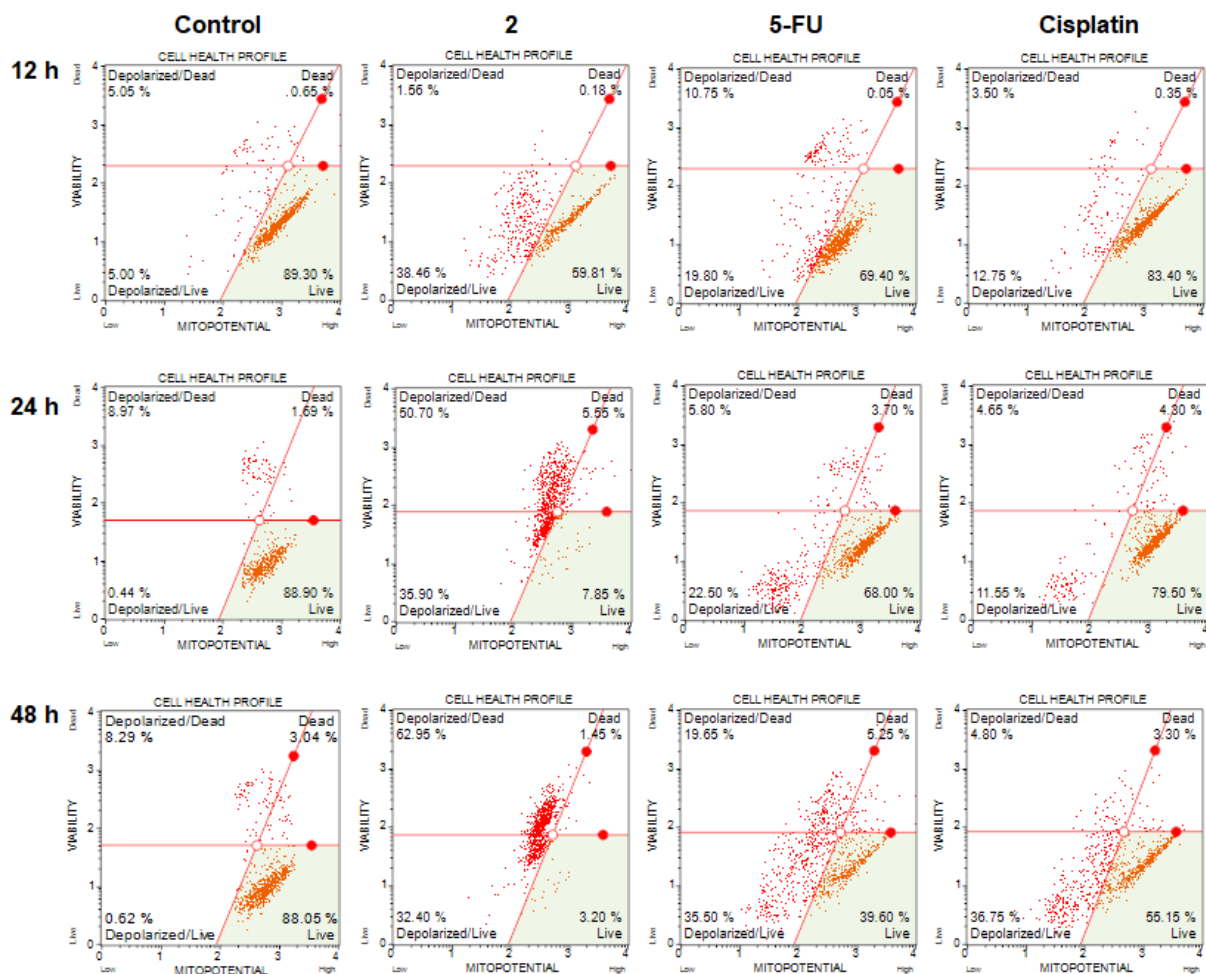

**Fig. S11** Mitochondrial membrane depolarization in HCT116 cells treated with **2** (10  $\mu$ M), 5-FU (172  $\mu$ M) and cisplatin (33.9  $\mu$ M), respectively, for 12, 24 and 48 h. 5-FU and cisplatin were used as positive controls.



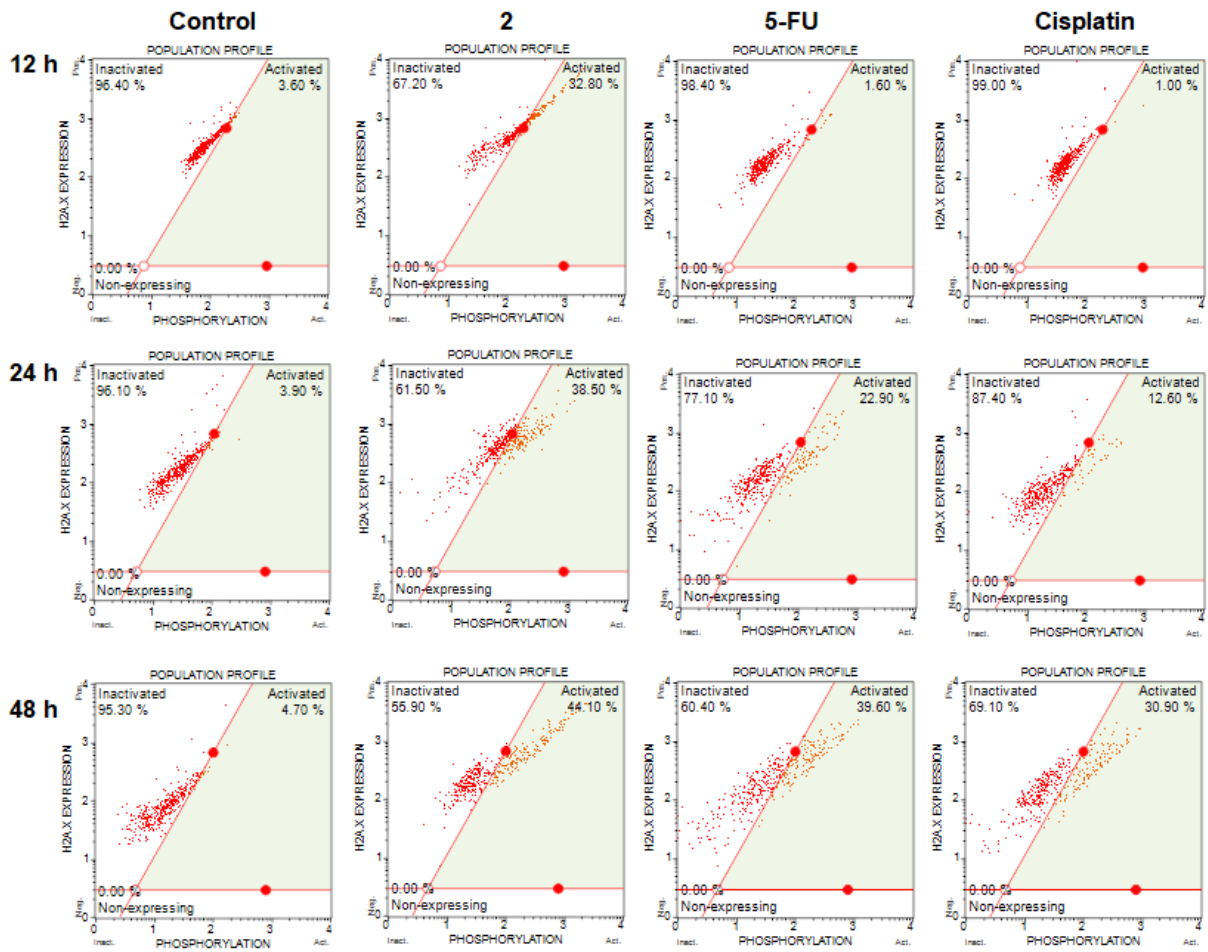

**Fig. S12** H2AX expressions in HCT116 cells treated with 2 (10  $\mu$ M), 5-FU (172  $\mu$ M) and cisplatin (33.9  $\mu$ M), respectively, for 12, 24 and 48 h. 5-FU and cisplatin were used as positive controls.
